# Supplementary material
Source: PubMed Central journal article supplement (PMC7065948)
Supplement: NIHMS1548661-supplement-1.pdf [file NIHMS1548661-supplement-1.pdf]

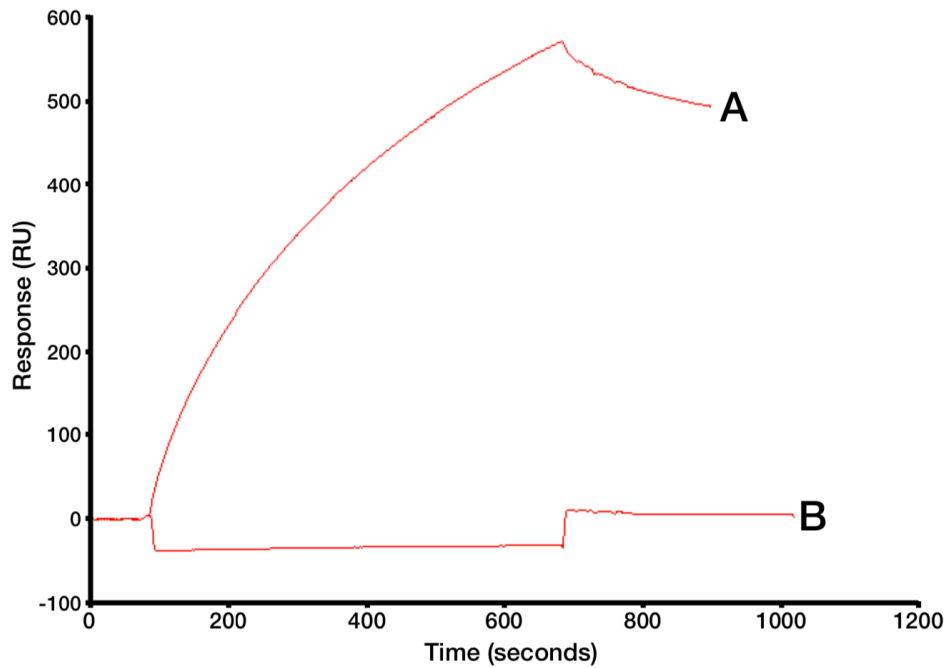

**Supplemental figure 1: Confirmation of proper MHC class I complex folding.** Binding of assembled MHC class I/ $\beta$ 2-microglobulin complexes to W6/32, a monoclonal antibody that recognizes only properly folded MHC class I complexes, was assessed by surface plasmon resonance (SPR). Mamu-A1\*002/ $\beta$ 2M complexes were prepared as described. After an hour incubation at room temperature, 3  $\mu$ l of the MHC class I sample was diluted in 87  $\mu$ l of HBS-EP+ buffer (GE Healthcare, Chicago, IL) and binding of the MHC class I complex to the anti-MHC class I monoclonal antibody W6/32 (ThermoFisher Scientific, Waltham, MA) was analyzed by surface plasmon resonance (SPR). As a control, 10  $\mu$ l of 2 mg/ml human  $\beta$ 2M and 2  $\mu$ l of 30 mg/ml MHC class I heavy chain were mixed together and diluted with 10 mM MES pH 6.5 to 80  $\mu$ l. As with the test sample, 3  $\mu$ l of the control sample was mixed with 87  $\mu$ l of HBS-EP+ buffer and analyzed by SPR without pre-incubation. SPR analysis was performed on a Biacore X100 instrument (GE), using a CM5 sensor chip with immobilized W6/32 antibody, and a contact time of 600 s and a flow rate of 5  $\mu$ l/min.

Shown are SPR sensorgrams of interaction between immobilized W6/32 antibody and (A) assembled MHC class I complexes and (B) control MHC class I/ $\beta$ 2-microglobulin, indicating that the assembled MHC class I complexes are recognized by and bind W6/32.

**Supplemental table I: GenBank accession numbers of SIV and SHIV strains included on the peptide array.** All sequences were used without modification; however, the SIVmac239 GenBank entry has a truncated Nef sequence, so a full-length version was manually added.

| <b>Virus</b> | <b>Strain/Isolate</b> | <b>Accession No.</b> | <b>Virus</b> | <b>Strain/Isolate</b> | <b>Accession No.</b> |
|--------------|-----------------------|----------------------|--------------|-----------------------|----------------------|
| SIV          | SIVmac239             | M33262.1             | SIV          | SIVmacL28-C1          | KU892415.1           |
| SIV          | pE660.CG7V            | JX648291.1           | SIV          | SIVmac746             | KU955513.1           |
| SIV          | pE660.CG7G            | JX648292.1           | SIV          | SIVmac766             | KU955514.1           |
| SIV          | SIVmac251.CM.p3c22    | KC522216.1           | SIV          | SIVmacCR53            | KU955515.1           |
| SIV          | SIVmac251.CM.p3d18    | KC522217.1           | SIV          | SIVmacPBE             | KU955516.1           |
| SIV          | SIVmac251.CM.p3c20    | KC522218.1           | SIV          | SIVsmR02012           | KU955517.1           |
| SIV          | SIVmac251.CM.tb9      | KC522219.1           | SIV          | SIVsmR95117           | KU955518.1           |
| SIV          | SIVmac251.CM.p3a6     | KC522220.1           | SIV          | SIVsmE660-FL14        | JQ864087.1           |
| SIV          | SIVmac251.CM.p3c6     | KC522221.1           | SIV          | SIVsmE660-FL8         | JQ864086.1           |
| SIV          | SIVmac251.CM.p3d20    | KC522222.1           | SIV          | SIVsmE660-FL6         | JQ864085.1           |
| SIV          | SIVmac251.CM.p3d1     | KC522223.1           | SIV          | SIVsmE660-FL10        | JQ864084.1           |
| SIV          | SIVmac251.CM.p3e10    | KC522224.1           | SIV          | SIVsmH635FC           | DQ201174.1           |
| SIV          | SIVmac251.CM.p3c7     | KC522225.1           | SIV          | SIVsmH635SB10         | DQ201173.1           |
| SIV          | SIVmac251.CM.p3e9     | KC522226.1           | SIV          | SIVsmH635F-L3         | DQ201172.1           |
| SIV          | SIVmac251.DB.p1e18    | KC522227.1           | SIV          | SIVsmE543             | U72748.2             |
| SIV          | SIVmac251.DB.p4e16    | KC522228.1           | SIV          | SIVmac32H             | D01065.1             |
| SIV          | SIVmac251.DB.p4g16    | KC522229.1           | SIV          | SIVMne027             | U79412.1             |
| SIV          | SIVmac251.DB.p1e23    | KC522230.1           | SHIV         | SHIV-1157ipd3N4       | DQ779174.2           |
| SIV          | SIVmac251.DB.p4a21    | KC522231.1           | SHIV         | pSF257.2              | KU521530.1           |
| SIV          | SIVmac251.DB.p4e11    | KC522232.1           | SHIV         | SHIV-89.6P            | U89134.1             |
| SIV          | SIVmac251.DB.p1e24    | KC522233.1           | SHIV         | SHIV_DH12_CL8         | JN560963.1           |
| SIV          | SIVmac251.DB.p4f10    | KC522234.1           | SHIV         | SHIV_DH12_CL7         | JN560962.1           |
| SIV          | SIVmac251.DB.p1e19    | KC522235.1           | SHIV         | SHIV_AD8              | JN560961.1           |
| SIV          | SIVmac251.DB.p4b1     | KC522236.1           | SHIV         | pSHIV_AD8_B_ES_3N6    | JN560960.1           |
| SIV          | SIVmac251.DB.p4e19    | KC522237.1           | SHIV         | SHIV AD8 B ES 3T7     | JN560959.1           |
| SIV          | SIVmac251.DB.p1e22    | KC522238.1           | SHIV         | SHIV-C2/1             | AF217181.1           |
| SIV          | SIVmac251.RD.p3h14    | KC522239.1           | SHIV         | SHIV-HXBc2P 3.2       | AF041850.1           |
| SIV          | SIVmac251.RD.p3i16    | KC522240.1           | SHIV         | SHIV-4                | AF038399.1           |
| SIV          | SIVmac251.RD.p3g16    | KC522241.1           | SHIV         | SHIV-89.6             | AF038398.1           |
| SIV          | SIVmac251.RD.p3g21    | KC522242.1           | SHIV         | SHIV-89.6Pcy243       | EF672090.1           |
| SIV          | SIVmac251.RD.p3j14    | KC522243.1           | SHIV         | SHIV.B.YU2C           | KU958489.1           |
| SIV          | SIVmac251.RD.p3j17    | KC522244.1           | SHIV         | SHIV.C.CH848.dCT      | KU958488.1           |
| SIV          | SIVmac251.RD.p3g14    | KC522245.1           | SHIV         | SHIV.C.CH505.dCT      | KU958487.1           |
| SIV          | SIVmac251.RD.p3j19    | KC522246.1           | SHIV         | SHIV.D.191859.dCT     | KU958486.1           |
| SIV          | SIVmac251.RD.tf20     | KC522247.1           | SHIV         | SHIV.D.191859         | KU958485.1           |
| SIV          | SIVmac251.RD.p3f16    | KC522248.1           | SHIV         | SHIV.A.BG505.dCT      | KU958484.1           |
| SIV          | SIVmac251.RD.p3i17    | KC522249.1           | SHIV         | genomic RNA           | AB177846.1           |
| SIV          | SIVmac251.RD.p3h1     | KC522250.1           | SHIV         | SHIV_SF162            | KF042063.1           |

| <b>Virus</b> | <b>Strain/Isolate</b> | <b>Accession No.</b> |
|--------------|-----------------------|----------------------|
| SIV          | SIVmac251.RD.tf1      | KC522251.1           |
| SIV          | SIVmac251.RD.p3h4     | KC522252.1           |
| SIV          | SIVmac251.RD.tf5      | KC522253.1           |

| <b>Virus</b> | <b>Strain/Isolate</b> | <b>Accession No.</b> |
|--------------|-----------------------|----------------------|
| SHIV         | SHIVku2               | AY751799.1           |
| SHIV         | 1B3                   | AF465242.1           |
| SHIV         | NHP model of AIDS     | BD161892.1           |

**Supplemental table II: Summary of Mamu-A1\*001 ELISPOT results.** Of the SIVmac239 peptides that strongly bound Mamu-A1\*001, we tested the top 90 highest-binding peptides, including 17 peptides corresponding to known epitopes, plus two additional peptides corresponding to known epitopes that were not in the top 90 (indicated by asterisks), by IFN- $\gamma$  ELISPOT. Shown here are the peptide array binding scores as well as the previously-established IC<sub>50</sub> values where available (14, 28). We performed IFN- $\gamma$  ELISPOTs using PBMC from four Mamu-A1\*001-positive, SIVmac239-infected rhesus macaques, and the number of animals for which each peptide was positive (bold text) is indicated.

| Peptide array ranking | Sequence           | Position           | Peptide array binding score (fluorescence intensity units) | IC <sub>50</sub> (nM) | Number of positive ELISPOTs |
|-----------------------|--------------------|--------------------|------------------------------------------------------------|-----------------------|-----------------------------|
| 43                    | CAPPGYAL*          | Env 233-240        | 8.3685                                                     | 1.9                   | 0                           |
| <b>9</b>              | <b>VTPNYADILL*</b> | <b>Vif 100-109</b> | <b>10.087</b>                                              | <b>2.6</b>            | <b>1</b>                    |
| 1621                  | LGPHTYTPKIV*       | Pol 147-156        | 4.3519                                                     | 3.0                   | 0                           |
| 59                    | CAPPGYALL*         | Env 233-241        | 7.7607                                                     | 5.5                   | 0                           |
| 35                    | STPPLVRLV*         | Pol 625-633        | 8.6749                                                     | 8.7                   | 0                           |
| <b>41</b>             | <b>TVPWPNASL*</b>  | <b>Env 620-628</b> | <b>8.4253</b>                                              | <b>10</b>             | <b>1</b>                    |
| <b>7</b>              | <b>VTPNYADIL*</b>  | <b>Vif 100-108</b> | <b>10.1469</b>                                             | <b>12</b>             | <b>1</b>                    |
| 28                    | STPPLVRL*          | Pol 625-632        | 8.9627                                                     | 26                    | 0                           |
| 31                    | YTPKIVGGI*         | Pol 151-159        | 8.846                                                      | 26                    | 0                           |
| 47                    | LAPVPIPF*          | Gag 372-379        | 8.2514                                                     | 29                    | 0                           |
| <b>44</b>             | <b>STPESANL*</b>   | <b>Tat 28-35</b>   | <b>8.329</b>                                               | <b>43</b>             | <b>2</b>                    |
| 30                    | LAPVPIPFA*         | Gag 372-380        | 8.8912                                                     | 50                    | 0                           |
| 20                    | LTPEKGWL*          | Vif 75-82          | 9.5103                                                     | 61                    | 0                           |
| 16                    | MTPAERLI*          | Pol 961-968        | 9.6721                                                     | 77                    | 0                           |
| <b>230</b>            | <b>CTPYDINQM*</b>  | <b>Gag 181-189</b> | <b>5.517</b>                                               | <b>86</b>             | <b>4</b>                    |
| 8                     | VTPNYADI*          | Vif 100-107        | 10.1361                                                    | 230                   | 0                           |
| 2                     | ITPIGLAPT*         | Env 502-510        | 10.451                                                     | 286                   | 0                           |
| 17                    | LSPRTLNAW*         | Gag 149-157        | 9.6436                                                     | 355                   | 0                           |
| 3                     | SSPPSYFQQT*        | Env 726-735        | 10.4333                                                    | -                     | 0                           |
| 1                     | LTPKWNNETW         | Env 628-637        | 10.8155                                                    | -                     | 0                           |
| 4                     | LTPKWNE            | Env 628-635        | 10.3383                                                    | -                     | 0                           |
| 5                     | ITPIGLAPTD         | Env 502-511        | 10.2741                                                    | -                     | 0                           |
| 6                     | ITPIGLAP           | Env 502-509        | 10.2183                                                    | -                     | 0                           |
| 10                    | SSPPSYFQQ          | Env 726-734        | 9.9876                                                     | -                     | 0                           |
| 11                    | LTPKWNNET          | Env 628-636        | 9.9236                                                     | -                     | 0                           |
| 12                    | LTPEKGWLS          | Vif 75-83          | 9.859                                                      | -                     | 0                           |
| 13                    | SSPPSYFQ           | Env 726-733        | 9.8311                                                     | -                     | 0                           |
| 14                    | LTPEKGWLST         | Vif 75-84          | 9.8008                                                     | 6827                  | 0                           |
| 15                    | LSPRTLNAWV         | Gag 149-158        | 9.7328                                                     | -                     | 0                           |
| 18                    | TPEALCDP           | Rev 91-98          | 9.6377                                                     | -                     | 0                           |

| Peptide array ranking | Sequence          | Position           | Peptide array binding score (fluorescence intensity units) | IC <sub>50</sub> (nM) | Number of positive ELISPOTS |
|-----------------------|-------------------|--------------------|------------------------------------------------------------|-----------------------|-----------------------------|
| 19                    | MTPAERLINM        | Pol 961-970        | 9.6144                                                     | -                     | 0                           |
| 21                    | MTPAERLIN         | Pol 961-969        | 9.4925                                                     | -                     | 0                           |
| 22                    | FSSPPSYFQQ        | Env 725-734        | 9.3375                                                     | -                     | 0                           |
| <b>23</b>             | <b>TPESANLGE</b>  | <b>Tat 29-37</b>   | <b>9.2769</b>                                              | -                     | <b>3</b>                    |
| 24                    | FSSPPSYFQ         | Env 725-733        | 9.2663                                                     | -                     | 0                           |
| 25                    | FSSPPSYF          | Env 725-732        | 9.2264                                                     | -                     | 0                           |
| 26                    | TPEALCDPTE        | Rev 91-100         | 9.196                                                      | -                     | 0                           |
| 27                    | SPPSYFQQ          | Env 727-734        | 8.9673                                                     | -                     | 0                           |
| 29                    | YTPKIVGGIG        | Pol 151-160        | 8.9392                                                     | -                     | 0                           |
| 32                    | LSPRTLNA          | Gag 149-156        | 8.7839                                                     | -                     | 0                           |
| 33                    | MSPSYVKY          | Vpx 62-69          | 8.7662                                                     | 6381                  | 0                           |
| 34                    | TPESANLG          | Tat 29-36          | 8.7261                                                     | -                     | 0                           |
| 36                    | APVPIPFA          | Gag 373-380        | 8.6296                                                     | -                     | 0                           |
| <b>37</b>             | <b>STPESANLGE</b> | <b>Tat 28-37</b>   | <b>8.4623</b>                                              | -                     | <b>3</b>                    |
| 38                    | STPPLVRLVF        | Pol 625-634        | 8.4394                                                     | -                     | 0                           |
| 39                    | MSPSYVKYR         | Vpx 62-70          | 8.4364                                                     | -                     | 0                           |
| 40                    | TPESANLGEE        | Tat 29-38          | 8.43                                                       | -                     | 0                           |
| 42                    | TPAERLIN          | Pol 962-969        | 8.374                                                      | -                     | 0                           |
| 45                    | TPEALCDPT         | Rev 91-99          | 8.2987                                                     | -                     | 0                           |
| 46                    | LAPVPIPFAA        | Gag 372-381        | 8.2954                                                     | -                     | 0                           |
| 48                    | APVPIPFAA         | Gag 373-381        | 8.2434                                                     | -                     | 0                           |
| <b>49</b>             | <b>YSFPDPPTDT</b> | <b>Rev 58-67</b>   | <b>8.0926</b>                                              | -                     | <b>1</b>                    |
| 50                    | SPPSYFQQT         | Env 727-735        | 8.0737                                                     | -                     | 0                           |
| 51                    | MSPSYVKYRY        | Vpx 62-71          | 8.0661                                                     | 1378                  | 0                           |
| 52                    | VPWPNASL          | Env 621-628        | 8.0275                                                     | -                     | 0                           |
| 53                    | TTVPWPNASL        | Env 619-628        | 8.0263                                                     | -                     | 0                           |
| 54                    | VPWPNASLTP        | Env 621-630        | 8.0239                                                     | -                     | 0                           |
| <b>55</b>             | <b>STPESANLG</b>  | <b>Tat 28-36</b>   | <b>7.9503</b>                                              | -                     | <b>3</b>                    |
| 56                    | YSFPDPPT          | Rev 58-65          | 7.8633                                                     | -                     | 0                           |
| 57                    | LSPLCITM          | Env 104-111        | 7.8383                                                     | -                     | 0                           |
| 58                    | TPDLAIQ           | Rev 67-74          | 7.8137                                                     | -                     | 0                           |
| 60                    | VPIPFAAA          | Gag 375-382        | 7.7329                                                     | -                     | 0                           |
| 61                    | TVPWPNAS          | Env 620-627        | 7.6856                                                     | -                     | 0                           |
| 62                    | TPAERLINM         | Pol 962-970        | 7.6717                                                     | -                     | 0                           |
| 63                    | VPWPNASLT         | Env 621-629        | 7.6711                                                     | -                     | 0                           |
| <b>64</b>             | <b>ISTPPLVRL</b>  | <b>Pol 624-632</b> | <b>7.6681</b>                                              | -                     | <b>1</b>                    |

| Peptide array ranking | Sequence          | Position           | Peptide array binding score (fluorescence intensity units) | IC <sub>50</sub> (nM) | Number of positive ELISPOTs |
|-----------------------|-------------------|--------------------|------------------------------------------------------------|-----------------------|-----------------------------|
| <b>65</b>             | <b>QTNPYPTGPG</b> | <b>Rev 22-31</b>   | <b>7.6257</b>                                              | -                     | <b>1</b>                    |
| <b>66</b>             | <b>ISTPPLVRLV</b> | <b>Pol 624-633</b> | <b>7.5903</b>                                              | -                     | <b>1</b>                    |
| 67                    | SPRTLNAW          | Gag 150-157        | 7.5645                                                     | -                     | 0                           |
| 68                    | QTNPYPTGP         | Rev 22-30          | 7.5606                                                     | -                     | 0                           |
| 69                    | TPIGLAPT          | Env 503-510        | 7.5415                                                     | -                     | 0                           |
| 70                    | TVPWPNASLT        | Env 620-629        | 7.5259                                                     | -                     | 0                           |
| 71                    | SPAIFQYT          | Pol 364-371        | 7.5057                                                     | -                     | 0                           |
| 72                    | SPPSYFQQTH        | Env 727-736        | 7.4898                                                     | -                     | 0                           |
| 73                    | TPAERLINMI        | Pol 962-971        | 7.4785                                                     | -                     | 0                           |
| 74                    | VPIPFAAAQ         | Gag 375-383        | 7.3507                                                     | -                     | 0                           |
| 75                    | LTACQGVGGP        | Gag 348-357        | 7.3473                                                     | -                     | 0                           |
| 76                    | TPLDLAIQQ         | Rev 67-75          | 7.3364                                                     | -                     | 0                           |
| 77                    | YSFPDPPTD         | Rev 58-66          | 7.325                                                      | -                     | 0                           |
| 78                    | VFSSPPSYFQ        | Env 724-733        | 7.2631                                                     | -                     | 0                           |
| 79                    | SPAIFQYTM         | Pol 364-372        | 7.2564                                                     | -                     | 0                           |
| 80                    | TPINIFGRN         | Pol 189-197        | 7.2498                                                     | -                     | 0                           |
| 81                    | QTNPYPTG          | Rev 22-29          | 7.2488                                                     | -                     | 0                           |
| 82                    | TPIGLAPTD         | Env 503-511        | 7.2413                                                     | -                     | 0                           |
| 83                    | VPIPFAAAQQ        | Gag 375-384        | 7.2296                                                     | -                     | 0                           |
| 84                    | TTVPWPNAS         | Env 619-627        | 7.2289                                                     | -                     | 0                           |
| 85                    | VFSSPPSYF         | Env 724-732        | 7.2109                                                     | -                     | 0                           |
| 86                    | APPGYALL          | Env 234-241        | 7.2054                                                     | -                     | 0                           |
| 87                    | SLTPKWNNET        | Env 627-636        | 7.1852                                                     | -                     | 0                           |
| 88                    | IPPSRSMML         | Vpr 94-101         | 7.182                                                      | 7576                  | 0                           |
| <b>89</b>             | <b>NTPEALCDPT</b> | <b>Rev 90-99</b>   | <b>7.1785</b>                                              | -                     | <b>1</b>                    |
| 90                    | LSPLCITMR         | Env 104-112        | 7.1633                                                     | -                     | 0                           |

**Supplemental table III: Comparison of Mamu-A1\*001 binding to known SIVmac239 epitopes and the equivalent SIVmac251 sequences.** Sequences with amino acid changes between viruses are indicated in bold. Only one sequence was considered “high binding” in SIVmac239 but not in SIVmac251 as the result of a position three proline to leucine substitution.

| SIVmac239 epitope | SIVmac239 intensity | SIVmac239 top 192 | SIVmac251 sequence | SIVmac251 intensity | SIVmac251 top 192 |
|-------------------|---------------------|-------------------|--------------------|---------------------|-------------------|
| ITPIGLAPT         | 10.45               | Yes               | ITPIGLAPT          | 10.45               | Yes               |
| SSPPSYFQQT        | 10.43               | Yes               | SSPPSYFQQT         | 10.43               | Yes               |
| <b>VTPNYADIL</b>  | <b>10.15</b>        | <b>Yes</b>        | <b>VTPDYADIL</b>   | <b>10.04</b>        | <b>Yes</b>        |
| <b>VTPNYADI</b>   | <b>10.14</b>        | <b>Yes</b>        | <b>VTPDYADI</b>    | <b>9.52</b>         | <b>Yes</b>        |
| <b>VTPNYADILL</b> | <b>10.09</b>        | <b>Yes</b>        | <b>VTPDYADILL</b>  | <b>9.80</b>         | <b>Yes</b>        |
| MTPAERLI          | 9.67                | Yes               | MTPAERLI           | 9.67                | Yes               |
| LSPRTLNAW         | 9.64                | Yes               | LSPRTLNAW          | 9.64                | Yes               |
| <b>LTPEKGWL</b>   | <b>9.51</b>         | <b>Yes</b>        | <b>LTPERGWL</b>    | <b>9.38</b>         | <b>Yes</b>        |
| STPPLVRL          | 8.96                | Yes               | STPPLVRL           | 8.96                | Yes               |
| YTPKIVGGI         | 8.85                | Yes               | YTPKIVGGI          | 8.85                | Yes               |
| STPPLVRLV         | 8.67                | Yes               | STPPLVRLV          | 8.67                | Yes               |
| TVPWPNASL         | 8.43                | Yes               | TVPWPNASL          | 8.43                | Yes               |
| CAPPGYAL          | 8.37                | Yes               | CAPPGYAL           | 8.37                | Yes               |
| <b>STPESANL</b>   | <b>8.33</b>         | <b>Yes</b>        | <b>TTPESANL</b>    | <b>8.72</b>         | <b>Yes</b>        |
| LAPVPIPF          | 8.25                | Yes               | LAPVPIPF           | 8.25                | Yes               |
| CAPPGYALL         | 7.76                | Yes               | CAPPGYALL          | 7.76                | Yes               |
| <b>ASTPESANL</b>  | <b>6.71</b>         | <b>Yes</b>        | <b>ATTPESANL</b>   | <b>7.43</b>         | <b>Yes</b>        |
| <b>QSPGGLDKGL</b> | <b>6.46</b>         | <b>Yes</b>        | <b>QSLGGLGKGL</b>  | <b>4.26</b>         | <b>No</b>         |
| VVPGFQAL          | 6.21                | Yes               | VVPGFQAL           | 6.21                | Yes               |
| GSPAIFQYTM        | 6.21                | Yes               | GSPAIFQYTM         | 6.21                | Yes               |
| QVPSLQYLA         | 6.04                | Yes               | QVPSLQYLA          | 6.04                | Yes               |
| GSPAIFQYT         | 5.91                | Yes               | GSPAIFQYT          | 5.91                | Yes               |
| CTPYDINQM         | 5.52                | No                | CTPYDINQM          | 5.52                | No                |
| YVPCHIRQI         | 4.85                | No                | YVPCHIRQI          | 4.85                | No                |
| GPPPPPPGGL        | 4.83                | No                | GPPPPPPGGL         | 4.83                | No                |
| QVPKFHLPV         | 4.77                | No                | QVPKFHLPV          | 4.77                | No                |
| IYPGIKTKHL        | 4.53                | No                | IYPGIKTKHL         | 4.53                | No                |
| RIPERLERW         | 4.50                | No                | RIPERLERW          | 4.50                | No                |
| QNPIPVGNI         | 4.41                | No                | QNPIPVGNI          | 4.41                | No                |
| LGPHYTPKIV        | 4.35                | No                | LGPHYTPKIV         | 4.35                | No                |
| DPPTNTPEAL        | 4.22                | No                | DPPTNTPEAL         | 4.22                | No                |
| HLPRELIFQV        | 4.20                | No                | HLPRELIFQV         | 4.20                | No                |
| VNPTLEEMLT        | 4.05                | No                | VNPTLEEMLT         | 4.05                | No                |
